# Supplementary material for: Development of a Candidate Multi-Epitope Subunit Vaccine against Klebsiella aerogenes: Subtractive Proteomics and Immuno-Informatics Approach
Source: MDPI journal article supplement (doi:10.3390/vaccines9111373), 2021-11-22
Supplement: s1 [file s1]

**Table S1: Final MHC-I epitopes selected on the basis of different parameters**

| Protein                                              | Epitopes     | Position | alleles                                   | antigenicity  | immunogenicity |
|------------------------------------------------------|--------------|----------|-------------------------------------------|---------------|----------------|
| <b>Lipopolysaccharide export system protein LptA</b> | IKINADKVVVTR | 65-76    | HLA-A*31:01                               | <b>0.9404</b> | 0.02297        |
| <b>LPS-assembly protein LptD</b>                     | NDSNSRRWMFYW | 304-315  | HLA-B*57:01<br>HLA-B*58:01<br>HLA-A*01:01 | <b>1.8656</b> | 0.02653        |
|                                                      | GMTASWPIDRW  | 682-693  | HLA-B*57:01<br>HLA-B*58:01                | <b>0.5632</b> | 0.31319        |
|                                                      | DQSHIGAYDSTL | 518-529  | HLA-B*38:01<br>HLA-B*39:01                | <b>0.5389</b> | 0.07989        |
|                                                      | TIEYRRDENRLV | 638-649  | HLA-C*06:02<br>HLA-C*07:01                | <b>0.8465</b> | 0.27979        |
|                                                      | SNSRRWMFYWNH | 306-317  | HLA-B*57:01<br>HLA-B*58:01                | <b>0.8565</b> | 0.38716        |
|                                                      | IEYRRDENRLVQ | 639-650  | HLA-C*06:02<br>HLA-C*07:01                | <b>0.7103</b> | 0.27756        |
|                                                      | EYRRDENRLVQL | 640-651  | HLA-C*06:02<br>HLA-C*07:01                | <b>0.6323</b> | 0.1888         |
|                                                      | FDATITPHYMNK | 255-266  | HLA-A*11:01<br>HLA-A*03:01                | <b>0.7156</b> | 0.0844         |
|                                                      | QVGMTASWPID  | 680-691  | HLA-E*01:01<br>HLA-A*32:01                | <b>0.7646</b> | 0.0908         |
|                                                      | SQVGMTASWPIV | 679-690  | HLA-E*01:01<br>HLA-A*32:01<br>HLA-B*39:01 | <b>1.1210</b> | 0.06821        |

|  |               |         |                                                                                             |               |         |
|--|---------------|---------|---------------------------------------------------------------------------------------------|---------------|---------|
|  | LMKQGENRYTI   | 153-164 | HLA-<br>B*08:01<br>HLA-<br>E*01:01                                                          | <b>0.6869</b> | 0.05632 |
|  | RRWMFYWNHNAV  | 309-320 | HLA-<br>B*27:05<br>HLA-<br>A*02:01<br>HLA-<br>B*39:01                                       | <b>0.8355</b> | 0.26285 |
|  | QVAEIWNARFKL  | 194-205 | HLA-<br>B*40:01<br>HLA-<br>A*32:01<br>HLA-<br>A*26:01<br>HLA-<br>A*25:01<br>HLA-<br>B*40:02 | <b>0.8663</b> | 0.51207 |
|  | NSRRWMFYWNHN  | 307-318 | HLA-<br>B*57:01                                                                             | <b>0.7878</b> | 0.44593 |
|  | YYWNIAPNFDAT  | 247-258 | HLA-<br>A*23:01<br>HLA-<br>C*07:02<br>HLA-<br>C*14:02<br>HLA-<br>A*24:02                    | <b>1.9021</b> | 0.36777 |
|  | VERFNISVGQIY  | 569-590 | HLA-<br>B*44:03<br>HLA-<br>A*30:02<br>HLA-<br>B*44:02                                       | <b>0.6663</b> | 0.1489  |
|  | NTFGINIELRGL  | 748-759 | HLA-<br>A*68:02<br>HLA-<br>A*68:01                                                          | <b>2.0490</b> | 0.47554 |
|  | NTKDTNVWKG DY | 129-140 | HLA-<br>A*30:02<br>HLA-<br>A*01:01                                                          | <b>1.0338</b> | 0.07828 |
|  | ERFNISVGQIYY  | 570-581 | HLA-<br>A*30:02<br>HLA-<br>A*01:01<br>HLA-<br>A*29:02                                       | <b>0.6841</b> | 0.07431 |
|  | LGSVPIFYSPYL  | 205-216 | HLA-<br>B*51:01                                                                             | <b>0.7025</b> | 0.04979 |
|  | GQPQPVRTVDAL  | 96-107  | HLA-<br>B*07:02                                                                             | <b>0.9072</b> | 0.07788 |
|  | TESRTGADNINW  | 583-594 | HLA-<br>B*44:02<br>HLA-<br>B*44:03                                                          | <b>1.3921</b> | 0.23133 |

|                                                   |               |         |                                           |               |         |
|---------------------------------------------------|---------------|---------|-------------------------------------------|---------------|---------|
|                                                   |               |         | HLA-B*57:01                               |               |         |
|                                                   | MQEGYTQTLEPR  | 497-508 | HLA-B*39:01                               | <b>1.3612</b> | 0.09338 |
|                                                   | DMQEGYTQTLEP  | 496-507 | HLA-B*39:01                               | <b>1.0761</b> | 0.10323 |
|                                                   | NQVTTGVTSRVY  | 553-564 | HLA-A*30:02<br>HLA-A*23:01                | <b>1.0571</b> | 0.11333 |
|                                                   | EQVAEIWNARFK  | 193-204 | HLA-A*32:01<br>HLA-A*25:01                | <b>0.6631</b> | 0.63818 |
|                                                   | TYWRISDDWGLR  | 609-620 | HLA-A*31:01                               | <b>1.8667</b> | 0.36631 |
|                                                   | WMFYWNHNAVID  | 311-322 | HLA-C*07:02<br>HLA-B*39:01<br>HLA-B*48:01 | <b>1.3380</b> | 0.41831 |
|                                                   | APNFDATITPHY  | 252-263 | HLA-A*29:02                               | <b>1.1750</b> | 0.38888 |
|                                                   | TKDTNVWKG DYQ | 130-141 | HLA-A*30:02                               | <b>0.7552</b> | 0.13432 |
|                                                   | KDTNVWKG DYQM | 131-142 | HLA-A*30:02                               | <b>0.5903</b> | 0.03507 |
|                                                   | AEIWNARFKLGS  | 196-207 | HLA-B*40:01                               | <b>1.1163</b> | 0.26973 |
|                                                   | CYAIRLG YERKL | 721-732 | HLA-C*06:02                               | <b>1.0312</b> | 0.22755 |
|                                                   | SRRWMFYWNHNA  | 308-319 | HLA-B*27:05                               | <b>0.9188</b> | 0.41222 |
|                                                   | MKQRGENRYTIL  | 154-165 | HLA-B*08:01                               | <b>0.7567</b> | 0.29612 |
|                                                   | EFRYLTQAGAGL  | 275-286 | HLA-B*27:05                               | <b>0.5342</b> | 0.0501  |
| <b>Outer-membrane lipoprotein carrier protein</b> | KTLLWFYNPFVEQ | 85-96   | HLA-A*32:01<br>HLA-A*02:01                | <b>0.5371</b> | 0.51613 |
|                                                   | KTLLWFYNPFVEQ | 85-96   | HLA-A*02:01<br>HLA-A*32:01                | <b>0.5371</b> | 0.51613 |
|                                                   | KRPNLFNWHMTQ  | 63-74   | HLA-B*27:05                               | <b>0.8777</b> | 0.20742 |

**Table S2: Final MHC-II epitopes selected on the basis of different parameters**

| protein                          | SN | HTL epitopes    | Position | alleles                                                                                                                                                                                 | Antigenicity  | IFN- $\gamma$ | IL-4        | IL-10    |  |
|----------------------------------|----|-----------------|----------|-----------------------------------------------------------------------------------------------------------------------------------------------------------------------------------------|---------------|---------------|-------------|----------|--|
| <b>LPS-assembly protein LptD</b> | 1  | EFKIDGKLVFERDMQ | 484-498  | <b>HLA-DRB1*03:09</b><br>HLA-DRB1*03:05<br>HLA-DRB1*03:06<br>HLA-DRB1*03:07<br>HLA-DRB1*03:08<br>HLA-DRB3*01:01<br>HLA-DRB1*11:28<br>HLA-DRB1*13:05<br>HLA-DRB1*03:01<br>HLA-DRB1*11:07 | <b>0.8281</b> | positive      | IL4-inducer | negative |  |
|                                  | 2  | FKIDGKLVFERDMQE | 485-499  | <b>HLA-DRB1*03:09</b><br>HLA-DRB1*03:05<br>HLA-DRB1*03:06<br>HLA-DRB1*03:07<br>HLA-DRB1*03:08<br>HLA-DRB1*11:28<br>HLA-DRB1*13:05<br>HLA-DRB1*03:01<br>HLA-DRB1*11:07                   | <b>0.6149</b> | positive      | IL4-inducer | negative |  |
|                                  | 3  | MPEFKIDGKLVFERD | 482-496  | <b>HLA-DRB1*03:09</b><br>HLA-DRB1*03:05<br>HLA-DRB1*03:01<br>HLA-DRB3*01:01<br>HLA-DRB1*03:06<br>HLA-DRB1*03:07<br>HLA-DRB1*03:08<br>HLA-DRB1*11:28<br>HLA-DRB1*13:05<br>HLA-DRB1*11:07 | <b>0.8419</b> | positive      | IL4-inducer | negative |  |
|                                  | 4  | PEFKIDGKLVFERDM | 483-497  | <b>HLA-DRB1*03:09</b><br>HLA-DRB1*03:05<br>HLA-DRB1*03:01<br>HLA-DRB1*03:06<br>HLA-DRB1*03:07<br>HLA-DRB1*03:08<br>HLA-DRB1*11:28<br>HLA-DRB1*13:05<br>HLA-DRB1*11:07                   | <b>0.9915</b> | Positive      | IL4-inducer | negative |  |
|                                  | 5  | VMPEFKIDGKLVFER | 481-495  | <b>HLA-DRB1*03:09</b><br>HLA-DRB1*03:05<br>HLA-DRB1*03:01<br>HLA-DRB3*01:01<br>HLA-DRB1*03:06<br>HLA-DRB1*03:07<br>HLA-DRB1*03:08<br>HLA-DRB1*11:28                                     | <b>0.8886</b> | Positive      | IL4-inducer | negative |  |

|  |        |                      |             |                                                                                                    |               |              |                     |              |  |
|--|--------|----------------------|-------------|----------------------------------------------------------------------------------------------------|---------------|--------------|---------------------|--------------|--|
|  |        |                      |             | HLA-DRB1*13:05<br>HLA-DRB1*11:07                                                                   |               |              |                     |              |  |
|  | 6      | QLNYRYASPEY<br>IQAT  | 650-<br>664 | <b>HLA-<br/>DRB1*09:01</b><br>HLA-DRB1*07:03                                                       | <b>1.0890</b> | Positi<br>ve | IL4-<br>induc<br>er | negati<br>ve |  |
|  | 7      | VQLNYRYASPE<br>YIQA  | 649-<br>663 | <b>HLA-<br/>DRB1*09:01</b><br>HLA-DRB1*07:03<br>HLA-DRB1*11:02<br>HLA-DRB1*11:21<br>HLA-DRB1*13:22 | <b>1.1174</b> | Positi<br>ve | IL4-<br>induc<br>er | negati<br>ve |  |
|  | 8      | LNRYRYASPEYI<br>QATL | 651-<br>665 | <b>HLA-<br/>DRB1*09:01</b><br>HLA-DRB1*07:03                                                       | <b>0.8852</b> | Positi<br>ve | IL4-<br>induc<br>er | negati<br>ve |  |
|  | 1<br>5 | HLAQAVHFVN<br>TNGD   | 409-<br>423 | <b>HLA-<br/>DRB1*04:10</b>                                                                         | <b>0.8088</b> | Positi<br>ve | IL4-<br>induc<br>er | negati<br>ve |  |
|  | 1<br>6 | LYAQAVHFVNT<br>NGDM  | 410-<br>424 | <b>HLA-<br/>DRB1*04:10</b>                                                                         | <b>0.5398</b> | Positi<br>ve | IL4-<br>induc<br>er | negati<br>ve |  |
|  | 1<br>7 | DYQMVGRRQGRG<br>TADL | 139-<br>153 | <b>HLA-<br/>DRB5*01:05</b>                                                                         | <b>1.0729</b> | Positi<br>ve | IL4-<br>induc<br>er | negati<br>ve |  |
|  | 1<br>8 | VWKG DYQMVGR<br>QGRG | 135-<br>149 | <b>HLA-<br/>DRB5*01:05</b><br>HLA-DRB1*03:09                                                       | <b>0.7250</b> | Positi<br>ve | IL4-<br>induc<br>er | negati<br>ve |  |
|  | 1<br>9 | WKGDYQMVGRQ<br>GRGT  | 136-<br>150 | <b>HLA-<br/>DRB5*01:05</b><br>HLA-DRB1*03:09                                                       | <b>1.0353</b> | Positi<br>ve | IL4-<br>induc<br>er | negati<br>ve |  |
|  | 2<br>0 | QVGMTASWPIV<br>DRWS  | 680-<br>694 | <b>HLA-<br/>DRB1*07:03</b>                                                                         | <b>0.5576</b> | Positi<br>ve | IL4-<br>induc<br>er | negati<br>ve |  |
|  | 2<br>1 | SQVGMTASWPI<br>VDRW  | 679-<br>693 | <b>LA-DRB1*07:03</b><br>HLA-DRB1*07:01                                                             | <b>0.5982</b> | Positi<br>ve | IL4-<br>induc<br>er | negati<br>ve |  |
|  | 2<br>2 | AGDTYWRISDD<br>WGLR  | 606-<br>620 | <b>HLA-<br/>DRB1*07:03</b>                                                                         | <b>1.6072</b> | Positi<br>ve | IL4-<br>induc<br>er | negati<br>ve |  |
|  | 2<br>3 | DTYWRISDDWG<br>LRGG  | 608-<br>622 | <b>HLA-<br/>DRB1*07:03</b>                                                                         | <b>1.4903</b> | Positi<br>ve | IL4-<br>induc<br>er | negati<br>ve |  |
|  | 2<br>4 | GDYWRISDDW<br>GLRG   | 607-<br>621 | <b>HLA-<br/>DRB1*07:03</b>                                                                         | <b>1.5175</b> | Positi<br>ve | IL4-<br>induc<br>er | negati<br>ve |  |
|  | 2<br>5 | TYWRISDDWGL<br>RGGI  | 609-<br>623 | <b>HLA-<br/>DRB1*07:03</b>                                                                         | <b>1.3712</b> | Positi<br>ve | IL4-<br>induc<br>er | negati<br>ve |  |

|                                                   |    |                     |         |                                              |               |          |             |          |  |
|---------------------------------------------------|----|---------------------|---------|----------------------------------------------|---------------|----------|-------------|----------|--|
|                                                   | 26 | WAGDTYWRISD<br>DWGL | 605-619 | <b>HLA-<br/>DRB1*07:03</b>                   | <b>0.7040</b> | Positive | IL4-inducer | negative |  |
|                                                   | 27 | WRISDDWGLRG<br>GIQY | 611-625 | <b>HLA-<br/>DRB1*07:03</b>                   | <b>1.6106</b> | Positive | IL4-inducer | negative |  |
|                                                   | 28 | YWRISDDWGLR<br>GGIQ | 610-624 | <b>HLA-<br/>DRB1*07:03</b>                   | <b>1.7107</b> | Positive | IL4-inducer | negative |  |
|                                                   | 29 | GISQVGMTASW<br>PIVD | 677-691 | <b>HLA-<br/>DRB1*07:01</b><br>HLA-DRB1*07:03 | <b>0.6028</b> | Positive | IL4-inducer | negative |  |
|                                                   | 30 | KEGISQVGMTA<br>SWPI | 675-689 | <b>HLA-<br/>DRB1*07:01</b><br>HLA-DRB1*07:03 | <b>0.8819</b> | Positive | IL4-inducer | negative |  |
| <b>Outer-membrane lipoprotein carrier protein</b> | 1  | DGKTLWFYNPF<br>VEQA | 83-97   | HLA-DQA1*01:01/DQB1*05:01 1                  | <b>0.5614</b> | positive | IL4-inducer | Negative |  |
|                                                   | 2  | SDGKTLWFYNP<br>FVEQ | 82-96   | HLA-DQA1*01:01/DQB1*05:01 1                  | <b>0.6977</b> | positive | IL4-inducer | Negative |  |
|                                                   | 3  | VSDGKTLWFYN<br>PFVE | 81-95   | HLA-DQA1*01:01/DQB1*05:01 1                  | <b>0.5433</b> | positive |             |          |  |

**Table S3: Final B Cell epitopes selected on the basis of different parameters**

| B cell epitopes                                      |                 |          |       |              |                |
|------------------------------------------------------|-----------------|----------|-------|--------------|----------------|
| Protein                                              | B cell Epitope  | Position | Score | Antigenicity | Immunogenicity |
| <b>Lipopolysaccharide export system protein LptA</b> | TQGTIKINADKVVV  | 61       | 0.85  | 0.6236       | 0.00862        |
|                                                      | LSLNIALASALLAA  | 8        | 0.58  | 1.0434       | 0.06495        |
|                                                      | KMHYELQNDVFVLT  | 111      | 0.52  | 0.9433       | 0.1772         |
| <b>LPS-assembly protein LptD</b>                     | DNINWENNDTTGSL  | 590      | 0.93  | 0.8324       | 0.36517        |
|                                                      |                 |          |       |              |                |
|                                                      | VMPEFKIDGKLVFE  | 481      | 0.91  | 1.1220       | 0.06815        |
|                                                      | YYWNIAPNFDATIT  | 247      | 0.85  | 1.7077       | 0.49894        |
|                                                      | GYVNQHFDA TVSTK | 362      | 0.81  | 0.8990       | 0.05901        |
|                                                      | SRRWMFYWNHNAVI  | 308      | 0.79  | 0.5648       | 0.47104        |
|                                                      | KLVFERDMQEGYTQ  | 490      | 0.77  | 0.6035       | 0.16586        |
|                                                      | MVGRQGRGTADLMK  | 142      | 0.72  | 0.7063       | 0.0515         |
|                                                      | NSYGAEPQLDINAY  | 386      | 0.68  | 1.7424       | 0.19838        |
|                                                      | AVIDQVWRLNADYT  | 319      | 0.66  | 0.5772       | 0.29531        |
|                                                      | PDNAVFTGNVDINQ  | 64       | 0.62  | 0.5371       | 0.42559        |
|                                                      | STAQQYKEGISQVG  | 669      | 0.52  | 0.6477       | -0.39953       |
| <b>Outer-membrane lipoprotein carrier protein</b>    | LWVKRPNLFNWHMT  | 60       | 0.68  | 1.1223       | 0.05981        |
